# Supplementary material
Source: publisher figshare collection journal article supplement (https://geolsoc.figshare.com/ndownloader/files/34226457)
Supplement: Supplementary file 1 [file 34226457]

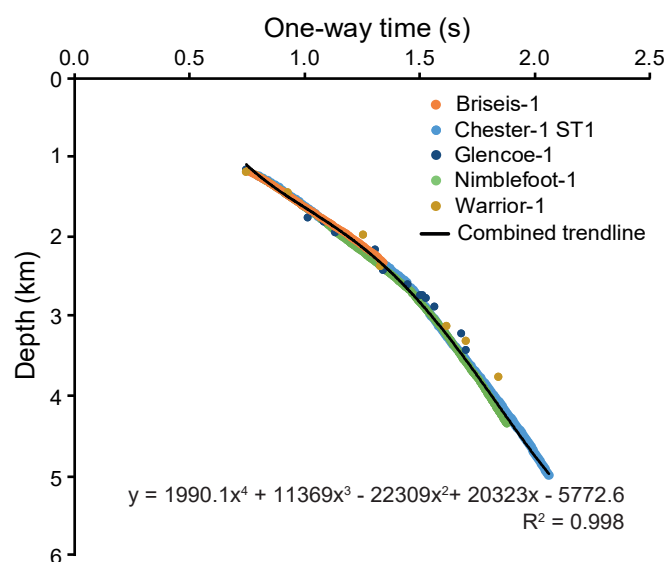

Supplementary Figure 1: Time-depth data for the five wells used in the study. Fitting a fourth-order polynomial trend-line through the cumulative data, and extrapolating it downwards, allows us to define seismic velocities at any depth.
